# Supplementary material for: Linking biological activity with herbal constituents by systems biology-based approaches: effects of Panax ginseng in type 2 diabetic Goto-Kakizaki rats
Source: Royal Society of Chemistry journal article supplement (doi:10.1039/c1mb05254c), 2011-09-07
Supplement: c1mb05254c.pdf [file c1mb05254c.pdf]

## 1 Supporting information

2 **Table S1** Detailed information of four lipid internal standards and quantified strategies used in the LC-MS lipidomics data analysis

| Lipid internal standard | protonated ion | ammoniated ion | concentration |                              |                            | Quantified lipids | %RSD in QC |
|-------------------------|----------------|----------------|---------------|------------------------------|----------------------------|-------------------|------------|
|                         | $[M + H]^+$    | $[M + NH_4]^+$ | stock (mg/ml) | working ( $\mu\text{g/ml}$ ) | final ( $\mu\text{g/ml}$ ) |                   |            |
| LPC (19:0)              | 538.3881       |                | 1             | 200                          | 20                         | LPC               | 9.8        |
| PE (30:0)               | 664.4925       |                | 0.75          | 200                          | 20                         | PE                | 14.2       |
| PC (34:0)               | 762.6023       |                | 2.2           | 1000                         | 100                        | PC, SPM           | 11.4       |
| TG (51:0)               |                | 866.8211       | 2.5           | 800                          | 80                         | DG, ChE, TG       | 13.5       |

3

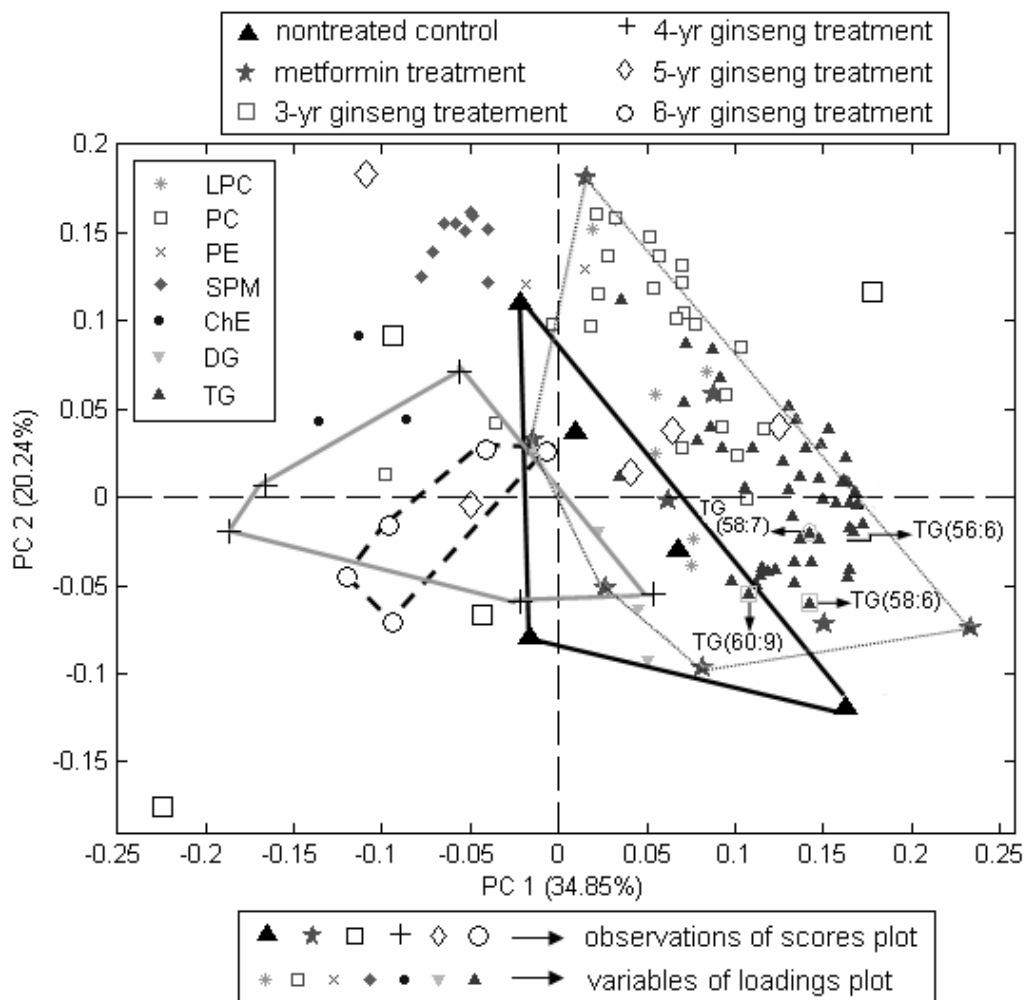

4

5 **Figure S1** Score and loading biplots of PCA of plasma lipidomics data from all study samples to  
6 reveal general clusters of rats of nontreatment and receiving different treatments (scores) and to  
7 examine which lipids contributed most to the clusters (loadings). Symbols of '▲' connected with  
8 black bold solid lines stand for nontreated control group, symbols of '★' connected with square dot  
9 lines stand for metformin treated group, symbols of '+' connected with gray bold solid lines stand for  
10 4 yr old ginseng treated group, symbols of '○' connected with black bold dashed lines stand for 6 yr  
11 old ginseng treated group. Symbols of '\*', '□', '×', '◇', '•', '▼' and '▲' in smaller size represent lipid  
12 species of LPC, PC, PE, SPM, ChE, DG and TG, respectively.
